# Supplementary material for: Computer- and NMR-Aided Design of Small-Molecule Inhibitors of the Hub1 Protein
Source: MDPI journal article supplement (doi:10.3390/molecules27238282), 2022-11-28
Supplement: s1 [file s1]

# Supplementary Information

For

## Computer- and NMR-Aided Design of Small-Molecule Inhibitors of the Hub1 Protein

Atilio Reyes Romero <sup>1,2</sup>, Katarzyna Kubica <sup>1</sup>, Radosław Kitel <sup>1</sup>, Ismael Rodríguez <sup>1</sup>, Katarzyna Magiera-Mularz <sup>1</sup>, Alexander Dömling <sup>2,3</sup>, Tad A. Holak <sup>1,\*</sup> and Ewa Surmiak <sup>1,\*</sup>

<sup>1</sup> Department of Organic Chemistry, Faculty of Chemistry, Jagiellonian University, Gronostajowa 2, 30-387 Krakow, Poland

<sup>2</sup> University of Groningen, Department of Drug Design, A. Deusinglaan 1, 9713 AV Groningen, The Netherlands

<sup>3</sup> Palacký University, CATRIN, Department of Innovative Chemistry, Šlechtitelů 241/27 779 00, Olomouc-Holice, Czech Republic

## 1. SUPPLEMENTARY FIGURES

**Figure S1.** Close up view of molecular interactions between peptide Snu66 (cyan cartoons) and Hub-1 protein (green surface and cartoons). Van der Waals, hydrogen bonds and ionic contacts are represented as yellow, red, and pink dotted lines respectively.

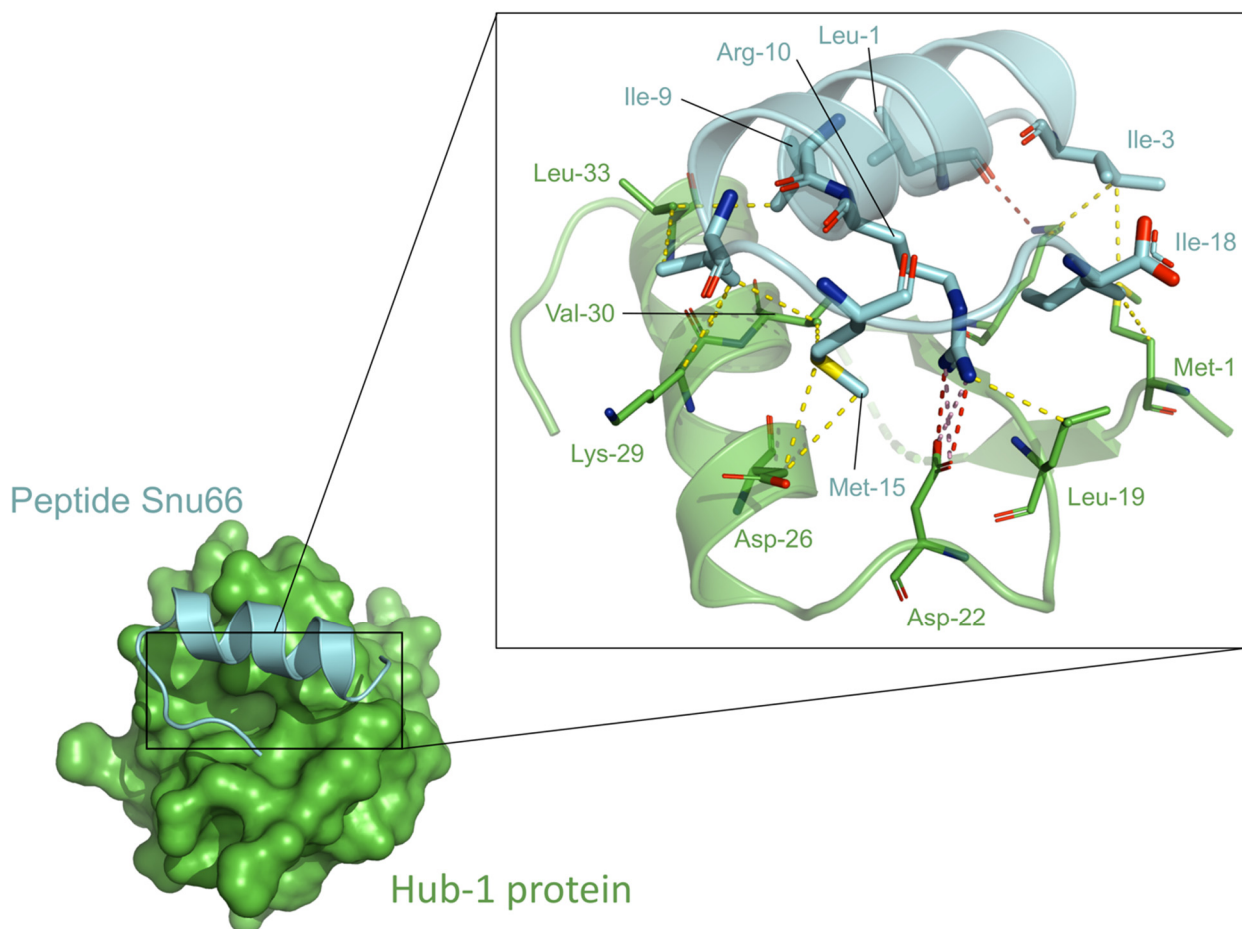

**Figure S2.** Scatter plot of CABS-dock energy score (y-axis) versus RMSD (x-axis). The RMSD value is calculated only for CA atoms. Blue, red and purple crosses indicate the lowest filtered, lowest medoid and top best models respectively.

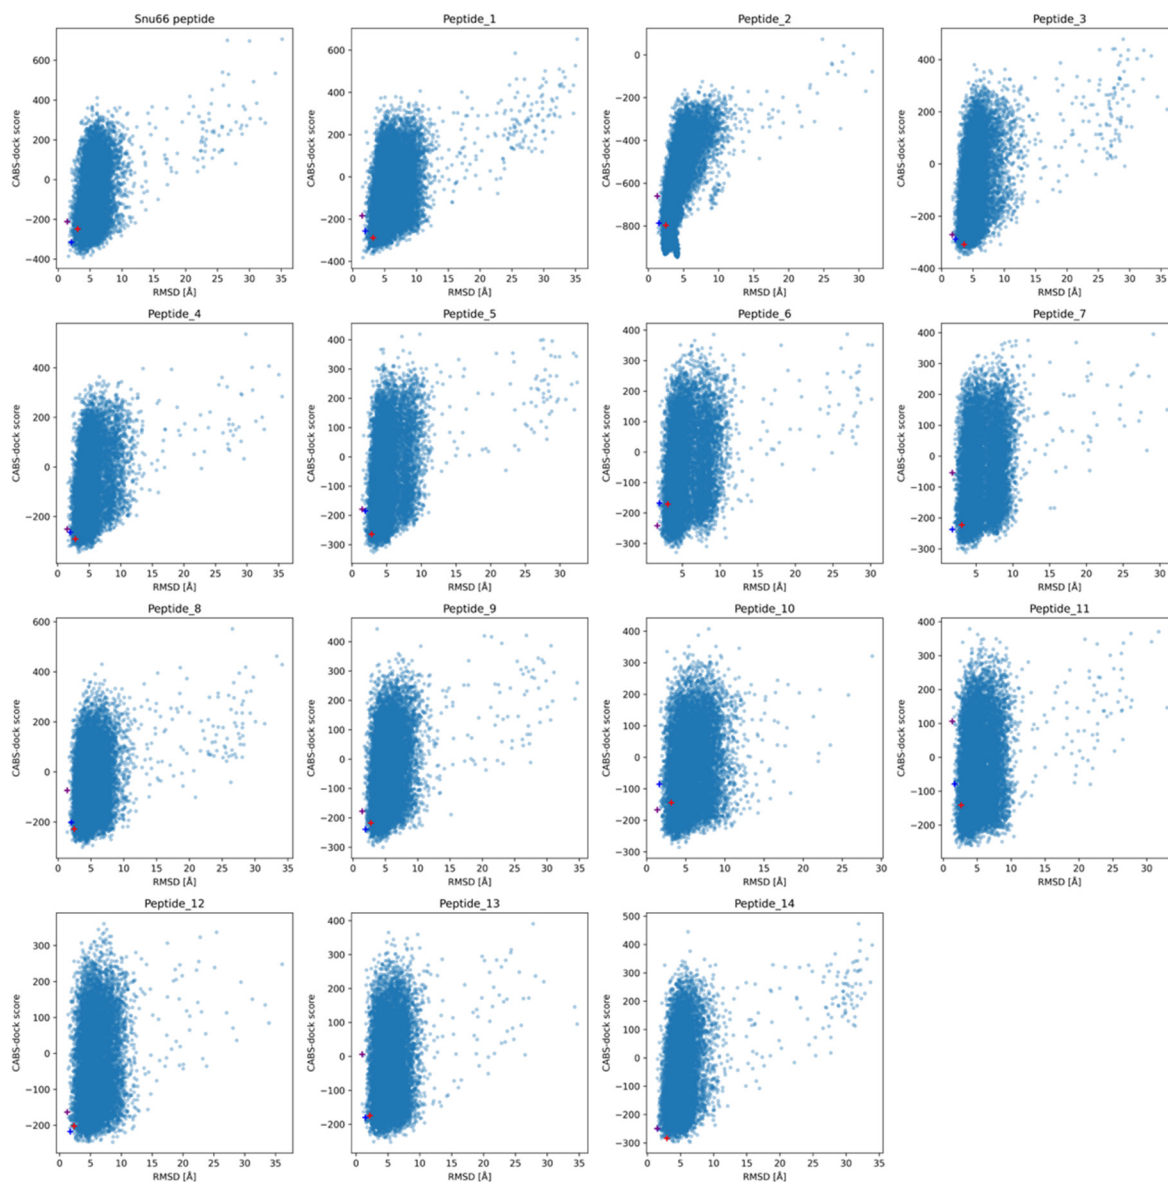

**Figure S3.** Comparison of the  $^1\text{H}$  NMR spectra of the Hub1 protein (red) titrated with the 10-fold excess of the peptide-11 (yellow) and peptide-14 (blue). Upper– aliphatic region; Lower – aromatic region

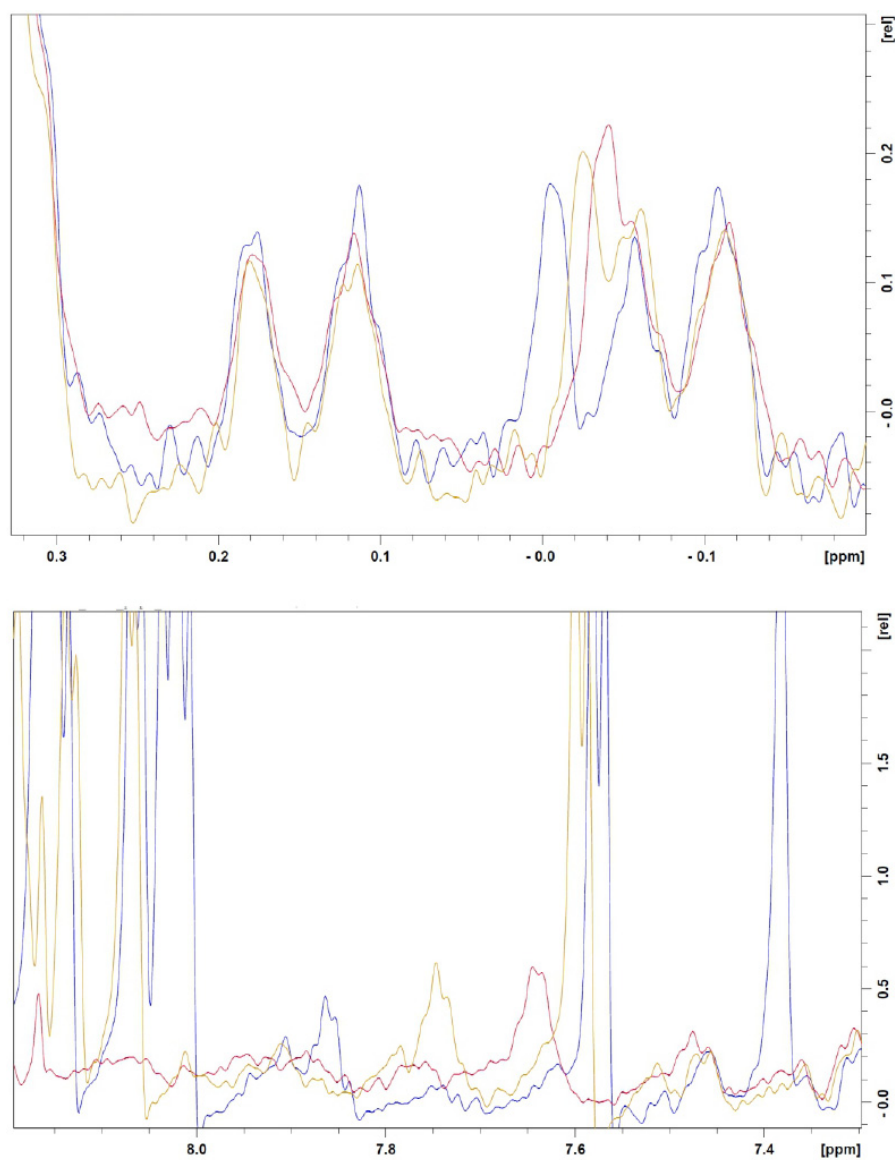

**Figure S4.** MST analysis of binding of Peptide-11 to Hub1

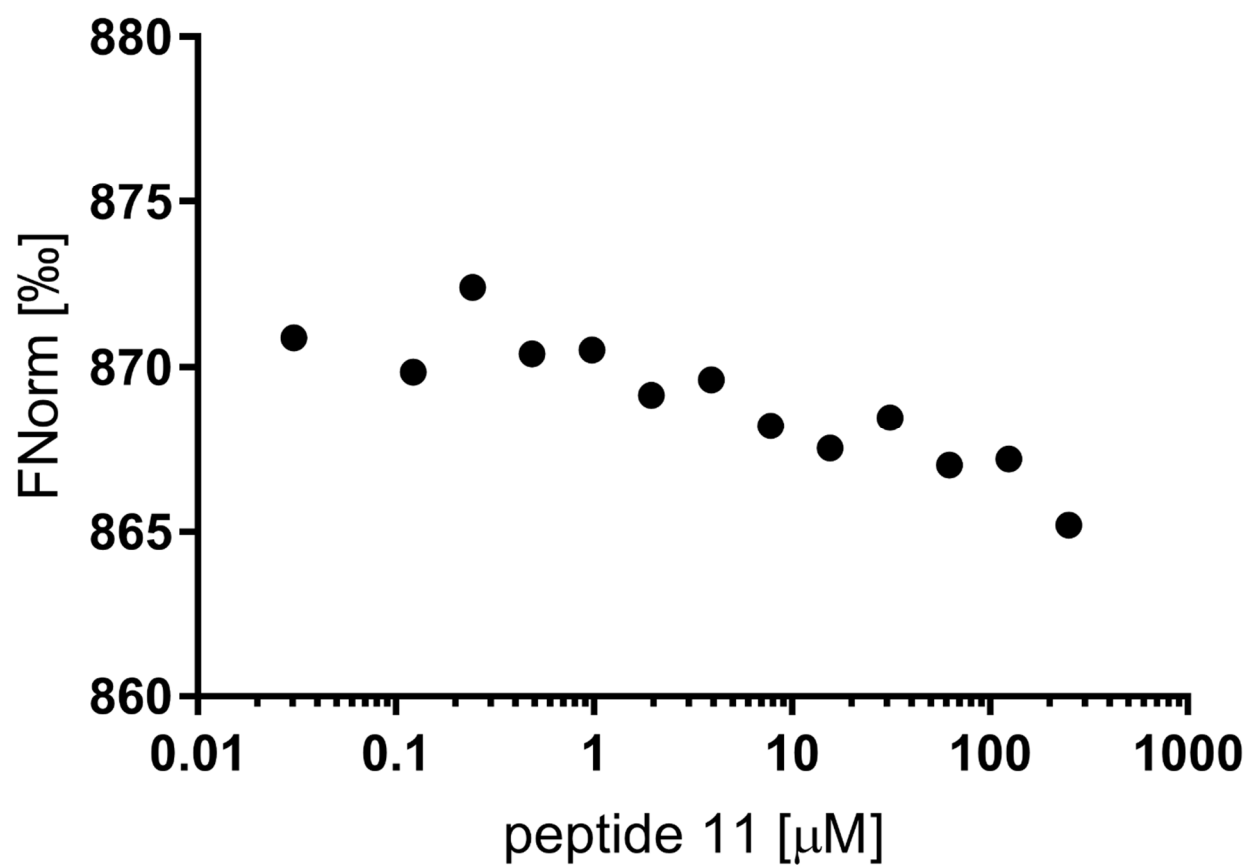

**Figure S5.** The NMR experiment of Hub1 protein titrated with P4G9 fragment with the pH correction of Hub1. Red – reference Hub1, blue – after 1:10 addition of P4G9, yellow – pH corrected to 6.8, green – pH corrected to 7.2. A.  $^1\text{H}$  NMR aliphatic region of the spectrum B.  $^1\text{H}$  NMR aromatic/amide region of the spectrum C.  $^1\text{H}$ - $^{15}\text{N}$  HMQC spectrum

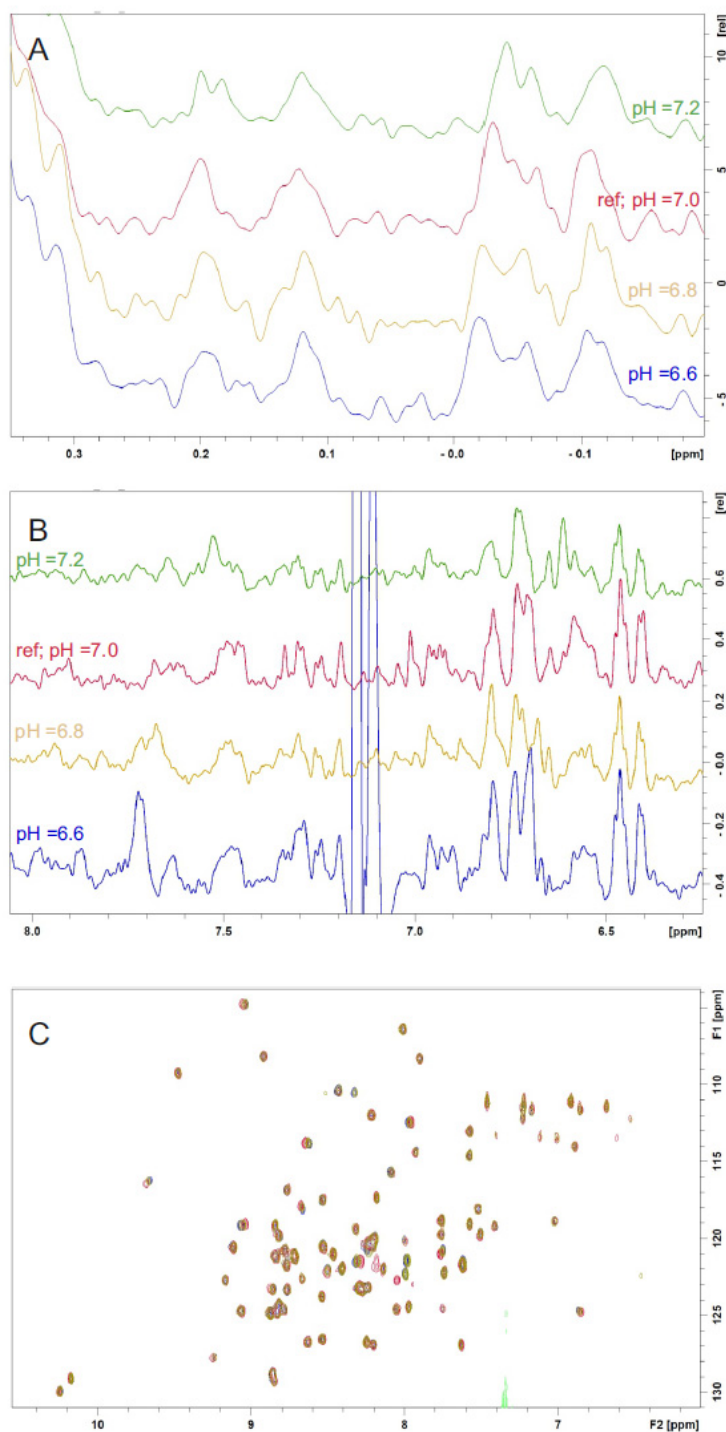

**Figure S6.**  $^1\text{H}$  NMR spectra of peptide-11 and peptide-14. Lack of the signal in low aliphatic region and the narrow shape of the peaks indicating that both peptides are lacking secondary structure in the solution. Spectra were measured in  $\text{H}_2\text{O}/\text{D}_2\text{O}$  with WATERGATE sequence

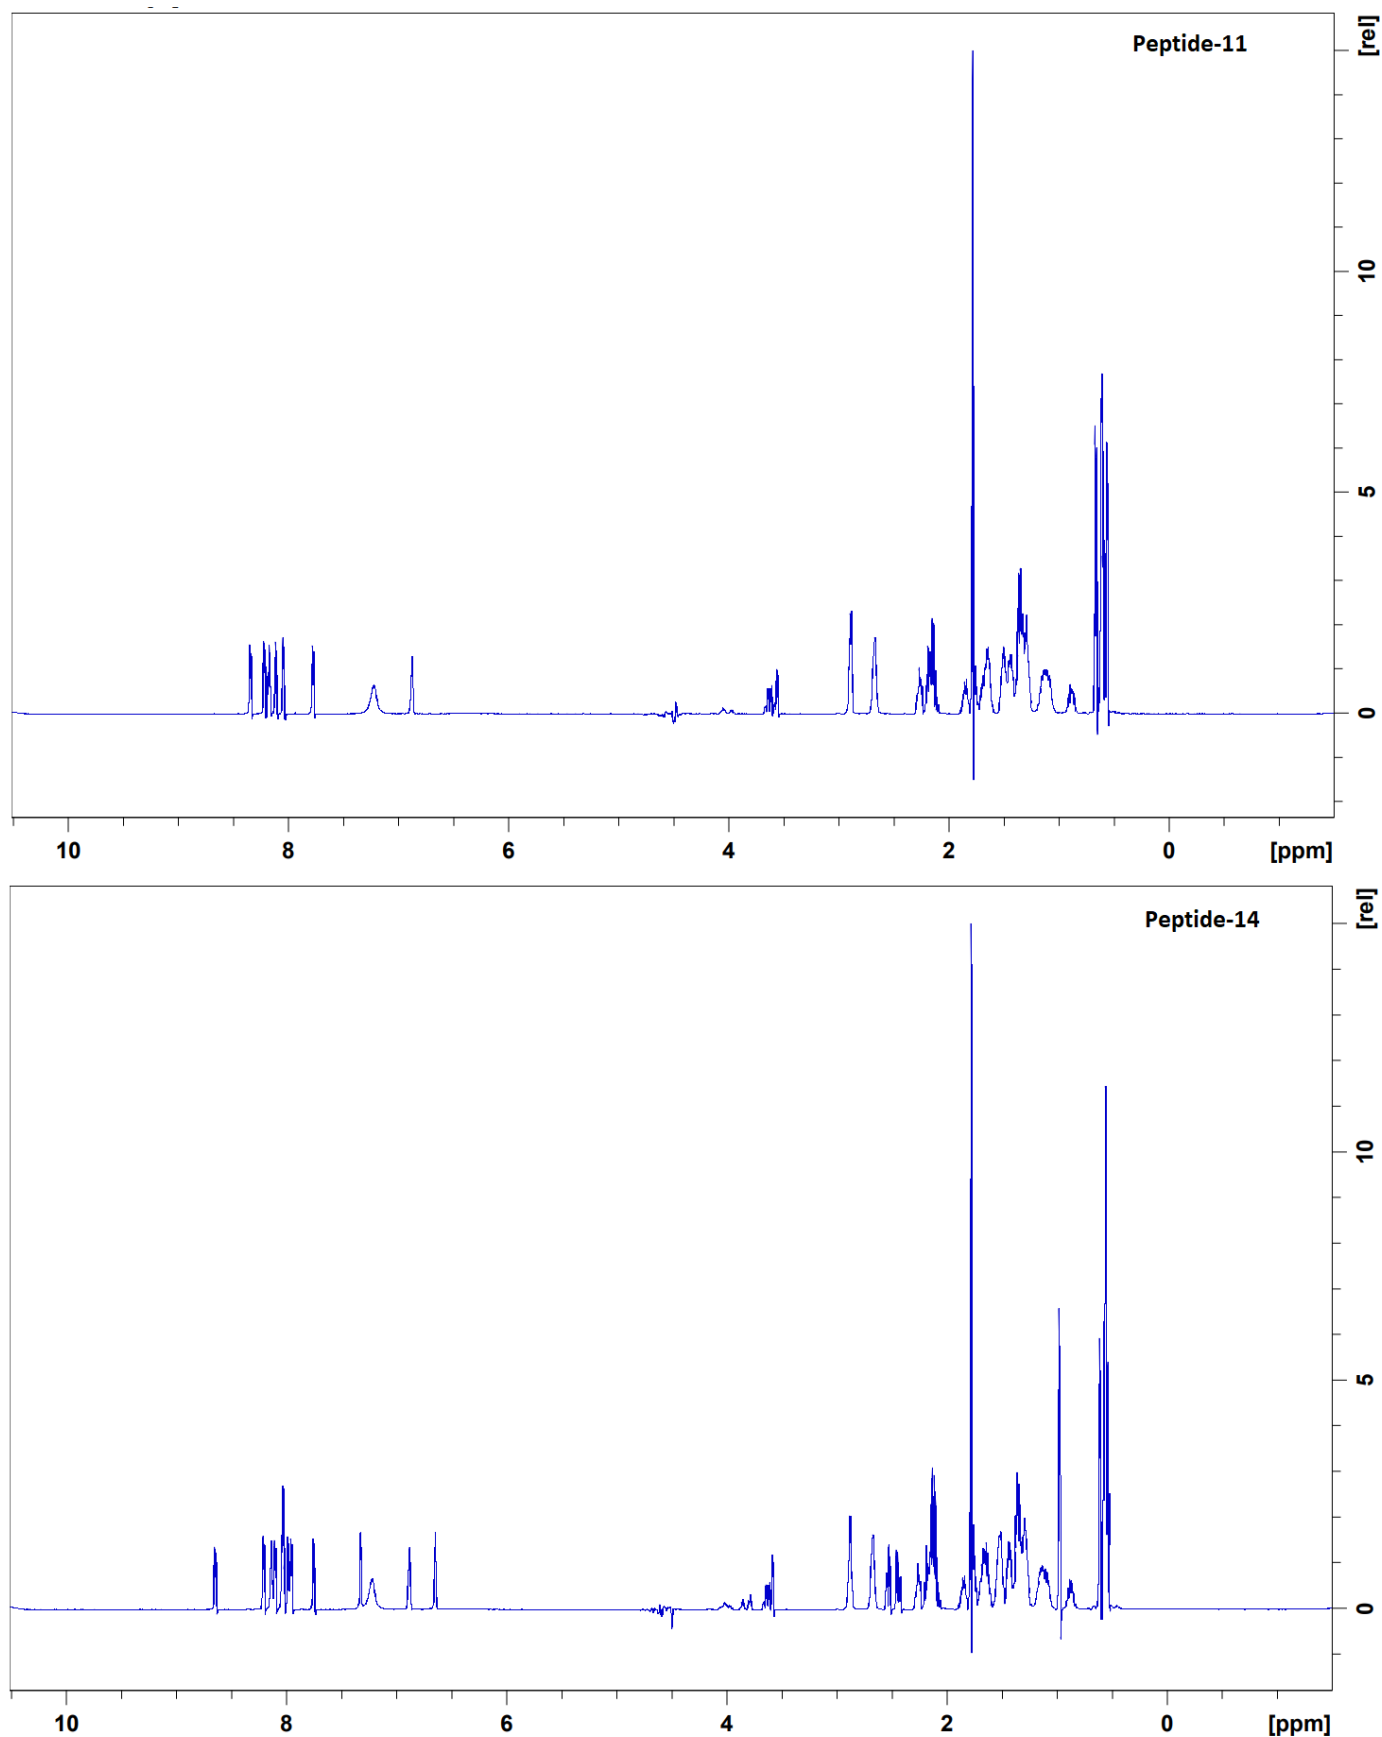

## 2. SUPPLEMENTAR TABLES

**Table S1.** Summary table of interface analysis of PDBePISA. The asterisks indicate the amino acids used for the distance restraints used during the molecular docking.  $\Delta^iG$  = solvation energy effect, |||: buried area percentage, one bar per 10%, HSDC: Hydrogen/Disulphide bond, Salt bridge or Covalent link, ASA: accessible solvent area, BSA: buried solvent area.

|    | Snu-66 peptide | HSDC | ASA ( $\text{\AA}^2$ ) | BSA ( $\text{\AA}^2$ ) | $\Delta^iG$<br>(kcal/mol) |
|----|----------------|------|------------------------|------------------------|---------------------------|
| 1  | C: LEU 7       | H    | 159.68                 | 74.70                  | 0.12                      |
| 2  | C: SER 8       |      | 54.90                  | 2.34                   | 0.04                      |
| 3  | C: ILE 9       |      | 114.45                 | 40.43                  | 0.63                      |
| 4  | C: GLU 10      |      | 123.72                 | 0.00                   | 0.00                      |
| 5  | C: GLU 11      |      | 86.14                  | 0.00                   | 0.00                      |
| 6  | C: THR 12 *    |      | 37.91                  | 37.78                  | 0.41                      |
| 7  | C: ASN 13      |      | 34.65                  | 0.00                   | 0.00                      |
| 8  | C: GLU 14      |      | 113.00                 | 0.00                   | 0.00                      |
| 9  | C: ILE 15 *    |      | 89.70                  | 63.63                  | 1.01                      |
| 10 | C: ARG 16 *    | HS   | 61.70                  | 59.23                  | -1.03                     |
| 11 | C: GLU 17      |      | 68.55                  | 0.00                   | 0.00                      |
| 12 | C: LYS 18 *    |      | 92.82                  | 3.01                   | 0.05                      |
| 13 | C: LEU 19 *    |      | 123.10                 | 68.13                  | 0.95                      |
| 14 | C: GLY 20      |      | 71.20                  | 0.00                   | 0.00                      |
| 15 | C: MET 21 *    |      | 92.29                  | 63.73                  | 1.48                      |
| 16 | C: LYS 22      |      | 69.80                  | 8.54                   | 0.14                      |
| 17 | C:PRO 23       |      | 103.46                 | 6.01                   | -0.07                     |
| 18 | C: ILE 24 *    |      | 139.43                 | 81.55                  | 1.13                      |



**Table S2.** Input commands for the docking associated to the peptide from Snu66 (HINDI domain). A detailed description of the command's lines can be found at <https://bitbucket.org/lcbio/cabsdock/wiki/Home>

| Peptide       | Commands                                                                                                                                                                                                                                                                                                                                                                                                                                                                                                                                                                                                                                                                                                                                                 |
|---------------|----------------------------------------------------------------------------------------------------------------------------------------------------------------------------------------------------------------------------------------------------------------------------------------------------------------------------------------------------------------------------------------------------------------------------------------------------------------------------------------------------------------------------------------------------------------------------------------------------------------------------------------------------------------------------------------------------------------------------------------------------------|
| Snu66 peptide | CABSdock -M -C -S -i 1M94.pdb -p<br>LSIEETNEIREKLGMKPI:CHHHHHHHHHCCCCCCC -v4 --dssp-command<br>Users/Atilio/anaconda3/envs/CABSdock/bin/mkdssp --aa-rebuild --<br>reference-pdb 3plu.pdb:A:C --ca-rest-add 3:PEP 18:PEP 7.7 1.0 --ca-rest-<br>add 15:PEP 11:PEP 5.4 1.0 --ca-rest-add 17:PEP 7:PEP 5.6 1.0 --sc-rest-<br>add 17:A 1:PEP 2.8 1 --sc-rest-add 1:A 3:PEP 3.9 1 --sc-rest-add 17:A 3:PEP<br>3.8 1 --sc-rest-add 17:A 6:PEP 3.3 1 --sc-rest-add 33:A 9:PEP 3.6 1 --sc-rest-<br>add 19:A 10:PEP 3.6 1 --sc-rest-add 22:A 10:PEP 3.9 1 --sc-rest-add 33:A<br>13:PEP 3.8 1 --sc-rest-add 30:A 13:PEP 3.8 1 --sc-rest-add 29:A 13:PEP 3.9<br>1 --sc-rest-add 26:A 15:PEP 4.0 1 --sc-rest-add 30:A 15:PEP 3.8 1 --sc-rest-<br>add 1:A 18:PEP 3.4 1 |
| Peptide 1     | CABSdock -M -C -S -i 1M94.pdb -p<br>SIEETNEIREKLGMKPI:HHHHHHHHHHCCCCCCC -v4 --dssp-command<br>Users/Atilio/anaconda3/envs/CABSdock/bin/mkdssp --aa-rebuild --<br>reference-pdb 3plu.pdb:A:C --ca-rest-add 2:PEP 17:PEP 7.7 1.0 --ca-rest-<br>add 14:PEP 10:PEP 5.4 1.0 --ca-rest-add 16:PEP 6:PEP 5.6 1.0 --sc-rest-<br>add 1:A 2:PEP 3.9 1.0 --sc-rest-add 17:A 2:PEP 3.8 1 --sc-rest-add 17:A<br>5:PEP 3.3 1 --sc-rest-add 33:A 8:PEP 3.6 1.0 --sc-rest-add 19:A 9:PEP 3.6<br>1.0 --sc-rest-add 22:A 9:PEP 3.9 1.0 --sc-rest-add 33:A 12:PEP 3.8 1.0 --sc-<br>rest-add 30:A 12:PEP 3.8 1.0 --sc-rest-add 29:A 12:PEP 3.9 1.0 --sc-rest-<br>add 26:A 14:PEP 4.0 1.0 --sc-rest-add 30:A 14:PEP 3.8 1 --sc-rest-add 1:A<br>17:PEP 3.4 1.0                 |
| Peptide 2     | CABSdock -M -C -S -i 1M94.pdb -p<br>IEETNEIREKLGMKPI:HHHHHHHHHHCCCCCCC -v4 --dssp-command<br>Users/Atilio/anaconda3/envs/CABSdock/bin/mkdssp --aa-rebuild --<br>reference-pdb 3plu.pdb:A:C --ca-rest-add 1:PEP 16:PEP 7.7 1.0 --ca-rest-<br>add 9:PEP 13:PEP 5.4 1.0 --ca-rest-add 15:PEP 5:PEP 5.6 1.0 --sc-rest-add<br>17:A 1:PEP 3.8 1 --sc-rest-add 17:A 4:PEP 3.3 1 --sc-rest-add 33:A 7:PEP<br>3.6 1 --sc-rest-add 19:A 8:PEP 3.6 1 --sc-rest-add 22:A 8:PEP 3.9 1 --sc-rest-<br>add 33:A 11:PEP 3.8 1 --sc-rest-add 30:A 11:PEP 3.8 1 --sc-rest-add 29:A<br>11:PEP 3.9 1 --sc-rest-add 26:A 13:PEP 4.0 1 --sc-rest-add 30:A 13:PEP 3.8<br>1 --sc-rest-add 1:A 16:PEP 3.4 1                                                                        |
| Peptide 3     | CABSdock -M -C -S -i 1M94.pdb -p<br>EETNEIREKLGMKPI:HHHHHHHHHHCCCCCCC -v4 --dssp-command<br>Users/Atilio/anaconda3/envs/CABSdock/bin/mkdssp --aa-rebuild --<br>reference-pdb 3plu.pdb:A:C --ca-rest-add 12:PEP 8:PEP 5.4 1.0 --ca-rest-<br>add 14:PEP 4:PEP 5.6 1.0 --sc-rest-add 17:A 3:PEP 3.3 1 --sc-rest-add 33:A<br>6:PEP 3.6 1 --sc-rest-add 19:A 7:PEP 3.6 1 --sc-rest-add 22:A 7:PEP 3.9 1 -<br>--sc-rest-add 33:A 10:PEP 3.8 1 --sc-rest-add 30:A 10:PEP 3.8 1 --sc-rest-<br>add 29:A 10:PEP 3.9 1 --sc-rest-add 26:A 12:PEP 4.0 1 --sc-rest-add 30:A<br>12:PEP 3.8 1 --sc-rest-add 1:A 15:PEP 3.4 1                                                                                                                                            |
| Peptide 4     | CABSdock -M -C -S -i 1M94.pdb -p<br>ETNEIREKLGMKPI:HHHHHHHHHHCCCCCCC -v4 --dssp-command<br>Users/Atilio/anaconda3/envs/CABSdock/bin/mkdssp --aa-rebuild --<br>reference-pdb 3plu.pdb:A:C --ca-rest-add 11:PEP 7:PEP 5.4 1.0 --ca-rest-<br>add 13:PEP 3:PEP 5.6 1.0 --sc-rest-add 17:A 2:PEP 3.3 1 --sc-rest-add 33:A<br>5:PEP 3.6 1 --sc-rest-add 19:A 6:PEP 3.6 1 --sc-rest-add 22:A 6:PEP 3.9 1 -<br>--sc-rest-add 33:A 9:PEP 3.8 1 --sc-rest-add 30:A 9:PEP 3.8 1 --sc-rest-add<br>29:A 9:PEP 3.9 1 --sc-rest-add 26:A 11:PEP 4.0 1 --sc-rest-add 30:A 11:PEP<br>3.8 1 --sc-rest-add 1:A 14:PEP 3.4 1                                                                                                                                                 |

|            |                                                                                                                                                                                                                                                                                                                                                                                                                                                                                                                                                                               |
|------------|-------------------------------------------------------------------------------------------------------------------------------------------------------------------------------------------------------------------------------------------------------------------------------------------------------------------------------------------------------------------------------------------------------------------------------------------------------------------------------------------------------------------------------------------------------------------------------|
| Peptide 5  | CABSdock -M -C -S -i 1M94.pdb -p TNEIREKLGMKPI:HHHHHHCCCCCCC -v4 --dssp-command Users/Atilio/anaconda3/envs/CABSdock/bin/mkdssp --aa-rebuild --reference-pdb 3plu.pdb:A:C 1.0 --ca-rest-add 10:PEP 6:PEP 5.4 1.0 --ca-rest-add 12:PEP 2:PEP 5.6 1.0 --sc-rest-add 17:A 1:PEP 3.3 1 --sc-rest-add 33:A 4:PEP 3.6 1 --sc-rest-add 19:A 5:PEP 3.6 1 --sc-rest-add 22:A 5:PEP 3.9 1 --sc-rest-add 33:A 8:PEP 3.8 1 --sc-rest-add 30:A 8:PEP 3.8 1 - --sc-rest-add 29:A 8:PEP 3.9 1 --sc-rest-add 26:A 10:PEP 4.0 1 --sc-rest-add 30:A 10:PEP 3.8 1 --sc-rest-add 1:A 13:PEP 3.4 1 |
| Peptide 6  | CABSdock -M -C -S -i 1M94.pdb -p NEIREKLGMKPI:HHHHHHCCCCCCC -v4 --dssp-command Users/Atilio/anaconda3/envs/CABSdock/bin/mkdssp --aa-rebuild --reference-pdb 3plu.pdb:A:C --ca-rest-add 9:PEP 5:PEP 5.4 1.0 - --ca-rest-add 11:PEP 1:PEP 5.6 1.0 --sc-rest-add 33:A 3:PEP 3.6 1 --sc-rest-add 19:A 4:PEP 3.6 1 --sc-rest-add 22:A 4:PEP 3.9 1 --sc-rest-add 33:A 7:PEP 3.8 1 --sc-rest-add 30:A 7:PEP 3.8 1 --sc-rest-add 29:A 7:PEP 3.9 1 - --sc-rest-add 26:A 9:PEP 4.0 1 --sc-rest-add 30:A 9:PEP 3.8 1 --sc-rest-add 1:A 12:PEP 3.4 1                                      |
| Peptide 7  | CABSdock -M -C -S -i 1M94.pdb -p EIREKLGMKPI:HHHHCCCCCCC -v4 --dssp-command Users/Atilio/anaconda3/envs/CABSdock/bin/mkdssp --aa-rebuild --reference-pdb 3plu.pdb:A:C --ca-rest-add 3:PEP 10:PEP 6.3 1.0 --ca-rest-add 4:PEP 8:PEP 5.4 1.0 --ca-rest-add 7:PEP 5:PEP 5.4 1.0 --sc-rest-add 33:A 2:PEP 3.6 1 --sc-rest-add 19:A 3:PEP 3.6 1 --sc-rest-add 22:A 3:PEP 3.9 1 --sc-rest-add 33:A 6:PEP 3.8 1 --sc-rest-add 30:A 6:PEP 3.8 1 - --sc-rest-add 29:A 6:PEP 3.9 1 --sc-rest-add 26:A 8:PEP 4.0 1 --sc-rest-add 30:A 8:PEP 3.8 1 --sc-rest-add 1:A 11:PEP 3.4 1         |
| Peptide 8  | CABSdock -M -C -S -i 1M94.pdb -p IREKLGMKPI:HHHCCCCCCC -v4 --dssp-command Users/Atilio/anaconda3/envs/CABSdock/bin/mkdssp --aa-rebuild --reference-pdb 3plu.pdb:A:C --ca-rest-add 2:PEP 9:PEP 6.3 1.0 --ca-rest-add 3:PEP 7:PEP 5.4 1.0 --ca-rest-add 6:PEP 4:PEP 5.4 1.0 --sc-rest-add 33:A 1:PEP 3.6 1 --sc-rest-add 19:A 2:PEP 3.6 1 --sc-rest-add 22:A 2:PEP 3.9 1 --sc-rest-add 33:A 5:PEP 3.8 1 --sc-rest-add 30:A 5:PEP 3.8 1 - --sc-rest-add 29:A 5:PEP 3.9 1 --sc-rest-add 26:A 7:PEP 4.0 1 --sc-rest-add 30:A 7:PEP 3.8 1 --sc-rest-add 1:A 10:PEP 3.4 1            |
| Peptide 9  | CABSdock -M -C -S -i 1M94.pdb -p IREKLGMKP:HHHCCCCCCC -v4 --dssp-command Users/Atilio/anaconda3/envs/CABSdock/bin/mkdssp --aa-rebuild - --reference-pdb 3plu.pdb:A:C --ca-rest-add 2:PEP 9:PEP 6.3 1.0 --ca-rest-add 3:PEP 7:PEP 5.4 1.0 --ca-rest-add 6:PEP 4:PEP 5.4 1.0 --sc-rest-add 33:A 1:PEP 3.6 1 --sc-rest-add 19:A 2:PEP 3.6 1 --sc-rest-add 22:A 2:PEP 3.9 1 --sc-rest-add 33:A 5:PEP 3.8 1 --sc-rest-add 30:A 5:PEP 3.8 1 --sc-rest-add 29:A 5:PEP 3.9 1 --sc-rest-add 26:A 7:PEP 4.0 1 --sc-rest-add 30:A 7:PEP 3.8 1                                            |
| Peptide 10 | CABSdock -M -C -S -i 1M94.pdb -p IREKLGMK:HHHCCCCC -v4 --dssp-command Users/Atilio/anaconda3/envs/CABSdock/bin/mkdssp --aa-rebuild - --reference-pdb 3plu.pdb:A:C --ca-rest-add 4:PEP 4:PEP 5.4 1.0 --ca-rest-add 3:PEP 7:PEP 5.4 1.0 --sc-rest-add 33:A 1:PEP 3.6 1 --sc-rest-add 19:A 2:PEP 3.6 1 --sc-rest-add 22:A 2:PEP 3.9 1 --sc-rest-add 33:A 5:PEP 3.8 1 - --sc-rest-add 30:A 5:PEP 3.8 1 --sc-rest-add 29:A 5:PEP 3.9 1 --sc-rest-add 26:A 7:PEP 4.0 1 --sc-rest-add 30:A 7:PEP 3.8 1                                                                               |
| Peptide 11 | CABSdock -M -C -S -i 1M94.pdb -p IREKLGM:HHHCCCCC -v4 --dssp-command Users/Atilio/anaconda3/envs/CABSdock/bin/mkdssp --aa-rebuild - --reference-pdb 3plu.pdb:A:C --ca-rest-add 4:PEP 4:PEP 5.4 1.0 --ca-rest-add 3:PEP 7:PEP 5.4 1.0 --sc-rest-add 33:A 1:PEP 3.6 1 --sc-rest-add 19:A 2:PEP 3.6 1 --sc-rest-add 22:A 2:PEP 3.9 1 --sc-rest-add 33:A 5:PEP 3.8 1 - --sc-rest-add 30:A 5:PEP 3.8 1 --sc-rest-add 29:A 5:PEP 3.9 1 --sc-rest-add 26:A 7:PEP 4.0 1 --sc-rest-add 30:A 7:PEP 3.8 1                                                                                |
| Peptide 12 | CABSdock -M -C -S -i 1M94.pdb -p IREKLGM:HHHCCC -v4 --dssp-command Users/Atilio/anaconda3/envs/CABSdock/bin/mkdssp --aa-rebuild --reference-pdb 3plu.pdb:A:C --ca-rest-add 6:PEP 4:PEP 5.4 1.0 --sc-rest-add 33:A 1:PEP 3.6 1 --sc-rest-add 19:A 2:PEP 3.6 1 --sc-rest-add 22:A 2:PEP 3.9 1 --sc-rest-add 33:A 5:PEP 3.8 1 --sc-rest-add 30:A 5:PEP 3.8 1 --sc-rest-add 29:A 5:PEP 3.9 1                                                                                                                                                                                      |

|            |                                                                                                                                                                                                                                                                                                                                                                                                                                                                                                                       |
|------------|-----------------------------------------------------------------------------------------------------------------------------------------------------------------------------------------------------------------------------------------------------------------------------------------------------------------------------------------------------------------------------------------------------------------------------------------------------------------------------------------------------------------------|
| Peptide 13 | CABSdock -M -C -S -i 1M94.pdb -p IREKL:HHHCC -v4 --dssp-command<br>Users/Atilio/anaconda3/envs/CABSdock/bin/mkdssp --aa-rebuild --<br>reference-pdb 3plu.pdb:A:C --sc-rest-add 33:A 1:PEP 3.6 1 --sc-rest-add<br>19:A 2:PEP 3.6 1 --sc-rest-add 22:A 2:PEP 3.9 1 --sc-rest-add 33:A 5:PEP<br>3.8 1 --sc-rest-add 30:A 5:PEP 3.8 1 --sc-rest-add 29:A 5:PEP 3.9 1                                                                                                                                                      |
| Peptide 14 | CABSdock -M -C -S -i 1M94.pdb -p TNEIREKLGM:HHHHHHCCCC -v4 --<br>dssp-command Users/Atilio/anaconda3/envs/CABSdock/bin/mkdssp --aa-<br>rebuild --reference-pdb 3plu.pdb:A:C --ca-rest-add 6:PEP 10:PEP 5.4 1.0 --<br>sc-rest-add 17:A 1:PEP 3.3 1 --sc-rest-add 33:A 4:PEP 3.6 1 --sc-rest-add<br>19:A 5:PEP 3.6 1 --sc-rest-add 22:A 5:PEP 3.9 1 --sc-rest-add 33:A 8:PEP<br>3.8 1 --sc-rest-add 30:A 8:PEP 3.8 1 --sc-rest-add 29:A 8:PEP 3.9 1 --sc-rest-<br>add 26:A 10:PEP 4.0 1 --sc-rest-add 30:A 10:PEP 3.8 1 |

**Table S3.** Summary table of CABS-dock modeling stage.

| ID            | Lowest  |      |           |                            | Filtered |     |           |                            | Medoid  |     |           |                            |
|---------------|---------|------|-----------|----------------------------|----------|-----|-----------|----------------------------|---------|-----|-----------|----------------------------|
|               | Replica | ID   | RMS D (Å) | CABS-dock score (kcal/mol) | Replica  | ID  | RMS D (Å) | CABS-dock score (kcal/mol) | Replica | ID  | RMS D (Å) | CABS-dock score (kcal/mol) |
| Peptide_1     | 3       | 913  | 1.47      | -183.75                    | 0        | 224 | 1.96      | -255.68                    | 8       | 996 | 3.19      | -288.23                    |
| Peptide_2     | 3       | 413  | 1.24      | -659.76                    | 1        | 710 | 1.48      | -786.36                    | 9       | 874 | 2.46      | -796.55                    |
| Peptide_3     | 6       | 906  | 1.68      | -270.68                    | 1        | 636 | 2.20      | -287.51                    | 2       | 904 | 3.57      | -307.80                    |
| Peptide_4     | 5       | 50   | 1.51      | -250.34                    | 6        | 948 | 1.98      | -263.37                    | 8       | 693 | 2.80      | -290.10                    |
| Peptide_5     | 4       | 276  | 1.47      | -178.87                    | 8        | 901 | 1.90      | -184.32                    | 4       | 52  | 2.82      | -264.19                    |
| Peptide_6     | 9       | 1000 | 1.64      | -241.73                    | 4        | 395 | 1.94      | -167.49                    | 1       | 660 | 3.03      | -171.15                    |
| Peptide_7     | 3       | 159  | 1.74      | -53.89                     | 8        | 823 | 1.76      | -237.53                    | 8       | 976 | 3.04      | -222.90                    |
| Peptide_8     | 0       | 90   | 1.38      | -73.08                     | 6        | 807 | 2.02      | -201.25                    | 8       | 617 | 2.45      | -227.45                    |
| Peptide_9     | 8       | 361  | 1.41      | -177.39                    | 0        | 265 | 1.92      | -238.99                    | 8       | 735 | 2.75      | -217.15                    |
| Peptide_10    | 1       | 981  | 1.36      | -166.54                    | 7        | 989 | 1.63      | -85.14                     | 2       | 668 | 3.15      | -144.10                    |
| Peptide_11    | 8       | 184  | 1.32      | 106.29                     | 5        | 428 | 1.66      | -78.75                     | 2       | 429 | 2.63      | -140.98                    |
| Peptide_12    | 6       | 826  | 1.23      | -163.32                    | 3        | 906 | 1.72      | -217.14                    | 8       | 643 | 2.33      | -202.14                    |
| Peptide_13    | 1       | 475  | 0.97      | 6.22                       | 6        | 947 | 1.45      | -179.74                    | 4       | 767 | 2.16      | -174.60                    |
| Peptide_14    | 3       | 11   | 1.48      | -248.99                    | 0        | 891 | 1.49      | -249.93                    | 7       | 859 | 2.93      | -283.39                    |
| Snu66 peptide | 6       | 646  | 1.41      | -210.99                    | 4        | 293 | 2.07      | -314.78                    | 8       | 123 | 3.06      | -247.89                    |

**Table S4.** Summary table of CAPRI assessments across all the modeling stages.

| CAPRI          |        | CA representation      |           |           | AA representation |          |            |
|----------------|--------|------------------------|-----------|-----------|-------------------|----------|------------|
|                |        | CABS - dock simulation |           |           | ca2all.py         |          |            |
| ID             | Length | Medoid                 | Filtered  | Lowest    | Medoid            | Filtered | Lowest     |
| Peptide-1      | 17     | Incorrect              | Incorrect | Incorrect | Acceptable        | Medium   | Medium     |
| Peptide-2      | 16     | Incorrect              | Incorrect | Incorrect | Medium            | Medium   | Medium     |
| Peptide-3      | 15     | Incorrect              | Incorrect | Incorrect | Acceptable        | Medium   | Medium     |
| Peptide-4      | 14     | Incorrect              | Incorrect | Incorrect | Acceptable        | Medium   | Medium     |
| Peptide-5      | 13     | Incorrect              | Incorrect | Incorrect | Acceptable        | Medium   | Acceptable |
| Peptide-6      | 12     | Incorrect              | Incorrect | Incorrect | Acceptable        | Medium   | Medium     |
| Peptide-7      | 11     | Incorrect              | Incorrect | Incorrect | Acceptable        | Medium   | Medium     |
| Peptide-8      | 10     | Incorrect              | Incorrect | Incorrect | Acceptable        | Medium   | Acceptable |
| Peptide-9      | 9      | Incorrect              | Incorrect | Incorrect | Acceptable        | Medium   | Medium     |
| Peptide-10     | 8      | Incorrect              | Incorrect | Incorrect | Acceptable        | Medium   | Medium     |
| Peptide-11     | 7      | Incorrect              | Incorrect | Incorrect | Acceptable        | Medium   | Acceptable |
| Peptide-12     | 6      | Incorrect              | Incorrect | Incorrect | Acceptable        | Medium   | Medium     |
| Peptide-13     | 5      | Incorrect              | Incorrect | Incorrect | Acceptable        | Medium   | Medium     |
| Peptide-14     | 10     | Incorrect              | Incorrect | Incorrect | Acceptable        | Medium   | Acceptable |
| Snu-66 peptide | 18     | Incorrect              | Incorrect | Incorrect | Acceptable        | Medium   | Medium     |

**Table S5.** Summary table of Fnat values calculated across all the modeling stages. Fnat value computation is deprecated in models in form of CA representation.

| Fnat           |        | CA representation      |          |        | AA representation |          |        |
|----------------|--------|------------------------|----------|--------|-------------------|----------|--------|
|                |        | CABS - dock simulation |          |        | ca2all.py         |          |        |
| ID             | Length | Medoid                 | Filtered | Lowest | Medoid            | Filtered | Lowest |
| Peptide-1      | 17     | 0                      | 0        | 0      | 0.88              | 0.56     | 0.63   |
| Peptide-2      | 16     | 0                      | 0        | 0      | 0.75              | 0.56     | 0.69   |
| Peptide-3      | 15     | 0                      | 0        | 0      | 0.79              | 0.57     | 0.79   |
| Peptide-4      | 14     | 0                      | 0        | 0      | 0.79              | 0.64     | 0.64   |
| Peptide-5      | 13     | 0                      | 0        | 0      | 0.64              | 0.71     | 0.43   |
| Peptide-6      | 12     | 0                      | 0        | 0      | 0.69              | 0.69     | 0.77   |
| Peptide-7      | 11     | 0                      | 0        | 0      | 0.69              | 0.54     | 0.54   |
| Peptide-8      | 10     | 0                      | 0        | 0      | 0.77              | 0.62     | 0.46   |
| Peptide-9      | 9      | 0                      | 0        | 0      | 0.90              | 0.80     | 0.60   |
| Peptide-10     | 8      | 0                      | 0        | 0      | 0.80              | 0.80     | 0.70   |
| Peptide-11     | 7      | 0                      | 0        | 0      | 0.90              | 0.60     | 0.40   |
| Peptide-12     | 6      | 0                      | 0        | 0      | 0.43              | 0.71     | 0.57   |
| Peptide-13     | 5      | 0                      | 0        | 0      | 0.57              | 0.57     | 0.71   |
| Peptide-14     | 10     | 0                      | 0        | 0      | 0.46              | 0.64     | 0.46   |
| Snu-66 peptide | 18     | 0                      | 0        | 0      | 0.72              | 0.72     | 0.56   |

**Table S6.** Summary table of LRMS values.

| LRMS (Å)       |        | CA representation      |          |        | AA representation |          |        |
|----------------|--------|------------------------|----------|--------|-------------------|----------|--------|
|                |        | CABS - dock simulation |          |        | ca2all.py         |          |        |
| ID             | Length | Medoid                 | Filtered | Lowest | Medoid            | Filtered | Lowest |
| Peptide-1      | 17     | 3.19                   | 1.96     | 1.48   | 3.06              | 1.70     | 1.43   |
| Peptide-2      | 16     | 2.49                   | 1.45     | 1.29   | 2.33              | 1.18     | 1.04   |
| Peptide-3      | 15     | 3.55                   | 2.18     | 1.73   | 3.33              | 1.94     | 1.43   |
| Peptide-4      | 14     | 2.85                   | 1.94     | 1.52   | 2.55              | 1.84     | 1.31   |
| Peptide-5      | 13     | 2.88                   | 1.98     | 1.61   | 2.73              | 1.66     | 1.79   |
| Peptide-6      | 12     | 3.09                   | 1.99     | 1.69   | 3.02              | 1.96     | 1.48   |
| Peptide-7      | 11     | 3.05                   | 1.81     | 1.79   | 3.00              | 1.89     | 1.55   |
| Peptide-8      | 10     | 2.53                   | 2.01     | 1.48   | 2.33              | 1.99     | 1.37   |
| Peptide-9      | 9      | 2.82                   | 1.90     | 1.50   | 2.82              | 1.85     | 1.68   |
| Peptide-10     | 8      | 3.21                   | 1.61     | 1.37   | 3.23              | 1.70     | 1.46   |
| Peptide-11     | 7      | 2.65                   | 1.75     | 1.29   | 2.56              | 1.79     | 1.37   |
| Peptide-12     | 6      | 2.37                   | 1.82     | 1.27   | 2.74              | 2.07     | 1.09   |
| Peptide-13     | 5      | 2.20                   | 1.37     | 0.88   | 2.46              | 1.71     | 1.23   |
| Peptide-14     | 10     | 2.99                   | 1.51     | 1.38   | 2.96              | 1.66     | 1.48   |
| Snu-66 peptide | 18     | 3.17                   | 2.20     | 1.40   | 2.90              | 1.97     | 1.20   |

**Table S7.** Summary RMSD (Å) table of top 10 medoid in all atom representation.

| ID            | top_1 | top_2 | top_3 | top_4 | top_5 | top_6 | top_7 | top_8 | top_9 | top_10 |
|---------------|-------|-------|-------|-------|-------|-------|-------|-------|-------|--------|
| Snu66 peptide | 5.09  | 4.89  | 3.79  | 4.30  | 3.06  | 3.46  | 5.50  | 6.65  | 5.62  | 6.42   |
| Peptide 1     | 3.29  | 4.90  | 3.19  | 4.92  | 5.68  | 5.53  | 5.31  | 7.93  | 6.10  | 7.34   |
| Peptide 2     | 2.25  | 4.63  | 4.44  | 4.96  | 2.81  | 5.17  | 4.18  | 6.27  | 5.24  | 3.72   |
| Peptide 3     | 3.58  | 3.57  | 4.51  | 5.29  | 5.29  | 4.49  | 4.98  | 4.07  | 5.37  | 5.26   |
| Peptide 4     | 4.62  | 4.63  | 3.80  | 4.92  | 3.63  | 5.59  | 2.80  | 3.97  | 3.17  | 4.32   |
| Peptide 5     | 2.85  | 3.83  | 4.93  | 4.35  | 2.82  | 5.40  | 3.87  | 3.49  | 4.69  | 4.58   |
| Peptide 6     | 4.50  | 3.82  | 3.03  | 3.81  | 3.74  | 4.75  | 3.61  | 3.46  | 4.08  | 5.14   |
| Peptide 7     | 3.09  | 4.29  | 3.78  | 4.23  | 3.83  | 4.67  | 3.04  | 3.83  | 4.73  | 5.65   |
| Peptide 8     | 3.93  | 3.00  | 3.51  | 4.04  | 4.34  | 3.52  | 3.50  | 2.45  | 4.64  | 3.32   |
| Peptide 9     | 3.64  | 4.81  | 2.83  | 2.75  | 4.06  | 4.25  | 4.52  | 3.78  | 3.85  | 4.32   |
| Peptide 10    | 3.67  | 3.15  | 4.52  | 3.29  | 3.33  | 3.46  | 4.90  | 3.96  | 4.75  | 5.08   |
| Peptide 11    | 3.84  | 4.59  | 3.22  | 3.00  | 2.63  | 3.52  | 2.69  | 3.40  | 2.85  | 5.32   |
| Peptide 12    | 4.06  | 2.33  | 3.83  | 4.82  | 4.11  | 8.10  | 4.33  | 4.66  | 5.31  | 3.46   |
| Peptide 13    | 2.81  | 4.22  | 3.70  | 4.22  | 3.64  | 4.88  | 3.09  | 2.71  | 2.16  | 6.86   |
| Peptide 14    | 5.01  | 4.62  | 3.62  | 4.26  | 2.93  | 5.12  | 6.35  | 5.38  | 5.09  | 5.94   |



**Table S8.** Structures and code names of the tested fragments. Plate 1

|          | 1                                                                                   | 2                                                                                   | 3                                                                                   | 4                                                                                   | 5                                                                                   | 6                                                                                    | 7                                                                                     | 8                                                                                     | 9                                                                                     | 10                                                                                    | 11                                                                                    | 12                                                                                    |
|----------|-------------------------------------------------------------------------------------|-------------------------------------------------------------------------------------|-------------------------------------------------------------------------------------|-------------------------------------------------------------------------------------|-------------------------------------------------------------------------------------|--------------------------------------------------------------------------------------|---------------------------------------------------------------------------------------|---------------------------------------------------------------------------------------|---------------------------------------------------------------------------------------|---------------------------------------------------------------------------------------|---------------------------------------------------------------------------------------|---------------------------------------------------------------------------------------|
| <b>A</b> | DMSO                                                                                | 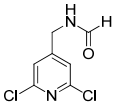   |    |    |    |   |    |    |    |    |    |    |
| <b>B</b> |    |    |    |    |    |    |    |    |    |    |    |    |
| <b>C</b> |    |    |    |    |    |   |    |    |    |    |    |    |
| <b>D</b> |    |    |    |    |    |    |    |    |    |    |    |    |
| <b>E</b> |    |    |    |    |    |   |    |    |    |    |    |    |
| <b>F</b> |   |   |   |   |   |  |   |   |   |   |   |   |
| <b>G</b> |  |  |  |  |  |  |  |  |  |  |  |  |
| <b>H</b> |  |  |  |  |  |  |  |  |  |  |  |  |

**Table S9.** Structures and code names of the tested fragments. Plate 2

|          | 1                                                                                   | 2                                                                                   | 3                                                                                   | 4                                                                                   | 5                                                                                   | 6                                                                                    | 7                                                                                     | 8                                                                                     | 9                                                                                     | 10                                                                                    | 11                                                                                    | 12                                                                                    |
|----------|-------------------------------------------------------------------------------------|-------------------------------------------------------------------------------------|-------------------------------------------------------------------------------------|-------------------------------------------------------------------------------------|-------------------------------------------------------------------------------------|--------------------------------------------------------------------------------------|---------------------------------------------------------------------------------------|---------------------------------------------------------------------------------------|---------------------------------------------------------------------------------------|---------------------------------------------------------------------------------------|---------------------------------------------------------------------------------------|---------------------------------------------------------------------------------------|
| <b>A</b> | DMSO                                                                                |    |    |    |    |    |    |    |    |    |    |    |
| <b>B</b> |    |    |    |    |    |    |    |    |    |    |    |    |
| <b>C</b> |    |    |    |    |    |    |    |    |    |    |    |    |
| <b>D</b> |    |    |    |    |    |    |    |    |    |    |    |    |
| <b>E</b> |    |    |    |    |    |    |    |    |    |    |    |    |
| <b>F</b> |   |   |   |   |   |   |   |   |   |   |   |   |
| <b>G</b> |  |  |  |  |  |  |  |  |  |  |  |  |
| <b>H</b> |  |  |  |  |  |  |  |  |  |  |  |  |

**Table S10.** Structures and code names of the tested fragments. Plate 3

|          | 1    | 2 | 3 | 4 | 5 | 6 | 7 | 8 | 9 | 10 | 11 | 12 |
|----------|------|---|---|---|---|---|---|---|---|----|----|----|
| <b>A</b> | DMSO |   |   |   |   |   |   |   |   |    |    |    |
| <b>B</b> |      |   |   |   |   |   |   |   |   |    |    |    |
| <b>C</b> |      |   |   |   |   |   |   |   |   |    |    |    |
| <b>D</b> |      |   |   |   |   |   |   |   |   |    |    |    |
| <b>E</b> |      |   |   |   |   |   |   |   |   |    |    |    |
| <b>F</b> |      |   |   |   |   |   |   |   |   |    |    |    |
| <b>G</b> |      |   |   |   |   |   |   |   |   |    |    |    |
| <b>H</b> |      |   |   |   |   |   |   |   |   |    |    |    |

**Table S11.** Structures and code names of the tested fragments. Plate 4

|          | 1                                                                                   | 2                                                                                   | 3                                                                                   | 4                                                                                   | 5                                                                                   | 6                                                                                    | 7                                                                                     | 8                                                                                     | 9                                                                                     | 10                                                                                    | 11                                                                                    | 12                                                                                    |
|----------|-------------------------------------------------------------------------------------|-------------------------------------------------------------------------------------|-------------------------------------------------------------------------------------|-------------------------------------------------------------------------------------|-------------------------------------------------------------------------------------|--------------------------------------------------------------------------------------|---------------------------------------------------------------------------------------|---------------------------------------------------------------------------------------|---------------------------------------------------------------------------------------|---------------------------------------------------------------------------------------|---------------------------------------------------------------------------------------|---------------------------------------------------------------------------------------|
| <b>A</b> | DMSO                                                                                |    |    |    |    |    |    |    |    |    |    |    |
| <b>B</b> |    |    |    |    |    |    |    |    |    |    |    |    |
| <b>C</b> |    |    |    |    |    |    |    |    |    |    |    |    |
| <b>D</b> |    |    |    |    |    |    |    |    |    |    |    |    |
| <b>E</b> |    |    |    |    |    |    |    |    |    |    |    |    |
| <b>F</b> |    |    |    |    |    |   |   |    |   |   |   |    |
| <b>G</b> |  |  |  |  |  |  |  |  |  |  |  |  |
| <b>H</b> |  |  |  |  |  |  |  |  |  |  |  |  |

**Table S12.** Structures and code names of the tested fragments. Plate 5

|          | 1                                                                                   | 2                                                                                   | 3                                                                                   | 4                                                                                   | 5                                                                                   | 6                                                                                   | 7                                                                                     | 8                                                                                     | 9                                                                                     | 10                                                                                    | 11                                                                                    | 12                                                                                    |
|----------|-------------------------------------------------------------------------------------|-------------------------------------------------------------------------------------|-------------------------------------------------------------------------------------|-------------------------------------------------------------------------------------|-------------------------------------------------------------------------------------|-------------------------------------------------------------------------------------|---------------------------------------------------------------------------------------|---------------------------------------------------------------------------------------|---------------------------------------------------------------------------------------|---------------------------------------------------------------------------------------|---------------------------------------------------------------------------------------|---------------------------------------------------------------------------------------|
| <b>A</b> | DMSO                                                                                | 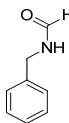   |    |    |    |    |    |    |    |    |    |    |
| <b>B</b> |    |    |    |    |    |    |    |    |    |    |    |    |
| <b>C</b> |    |    |    |    |    |    |    |    |    |    |    |    |
| <b>D</b> |    |    |    |    |    |    |    |    |    |    |    |    |
| <b>E</b> |    |    |    |    |    |    |    |    |    |    |    |    |
| <b>F</b> |   |   |   |   |   |   |   |   |   |   |   |   |
| <b>G</b> |  |  |  |  |  |  |  |  |  |  |  |  |
| <b>H</b> |  |  |  |  |  |  |  |  |  |  |  |  |

**Table S13.** Structures and titration  $^1\text{H}$  and SOFAS HMQC experiments of the initial hits. Red – reference Hub1 titrated with equal amount of DMSO, Blue - Hub1: ligand ratio 1:10

| Name  | Structure                                                                           | $^1\text{H}$ spectrum                                                               | HMQC spectrum                                                                        |
|-------|-------------------------------------------------------------------------------------|-------------------------------------------------------------------------------------|--------------------------------------------------------------------------------------|
| P1C3  | 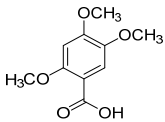   |    |    |
| P1C11 |    |   |   |
| P1D2  |  |  |  |
| P1E4  |  |  |  |

P1E5

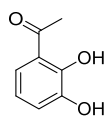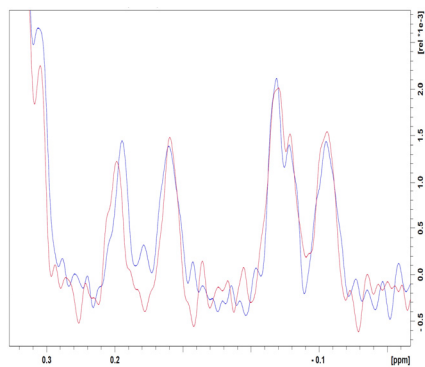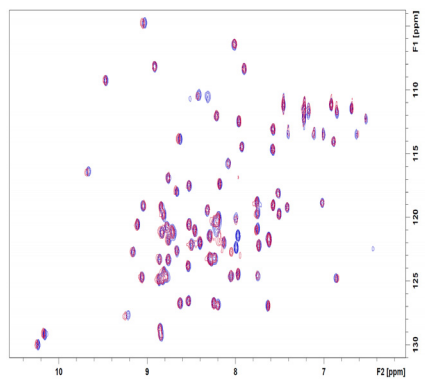

P1E9

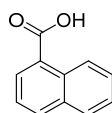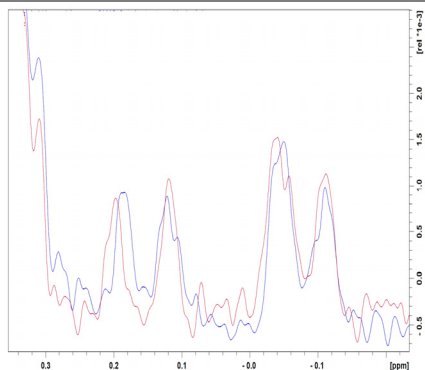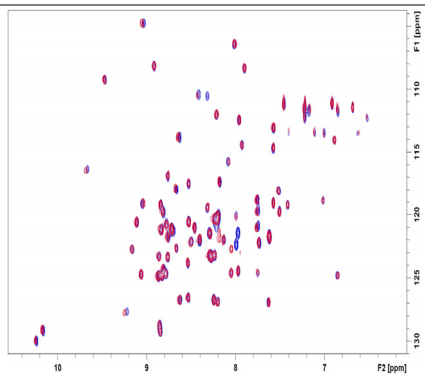

P2B7

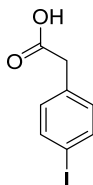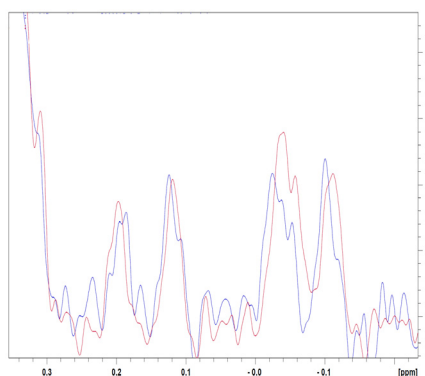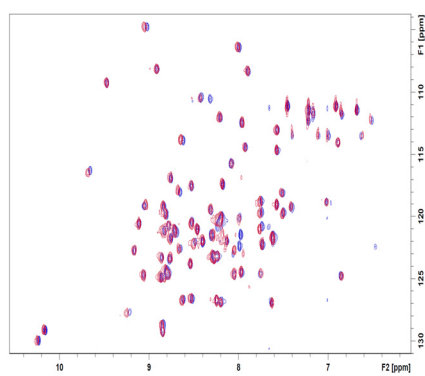

P2D9

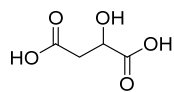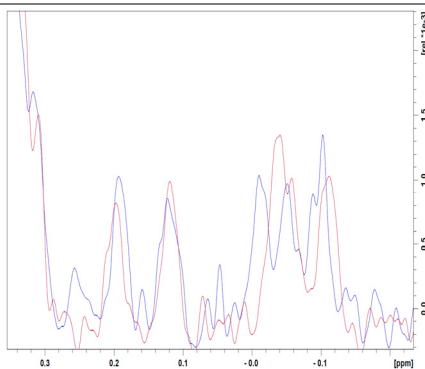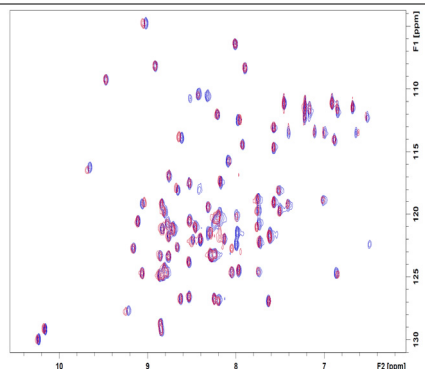

P2F7

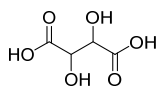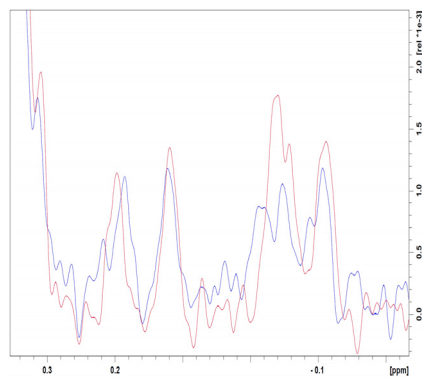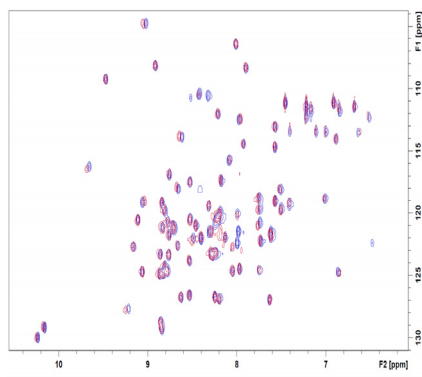

P2H1

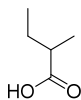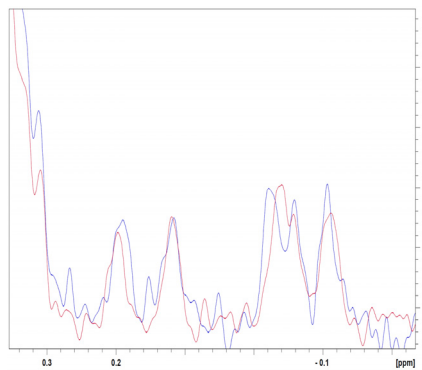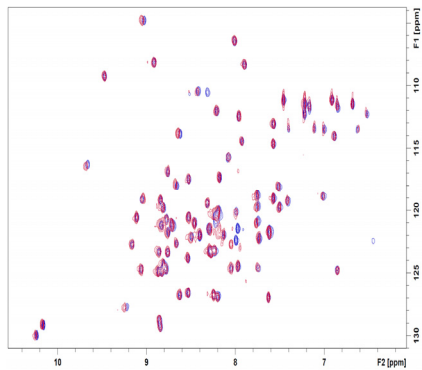

P2H4

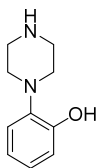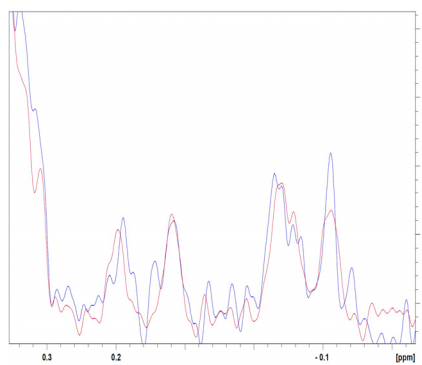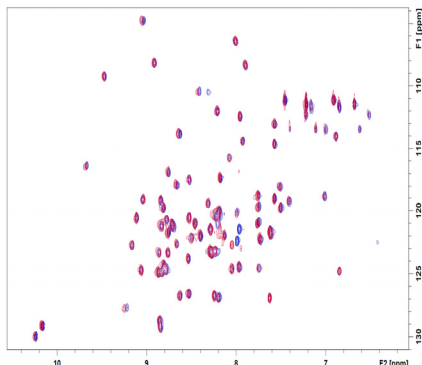

P4B10

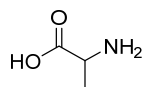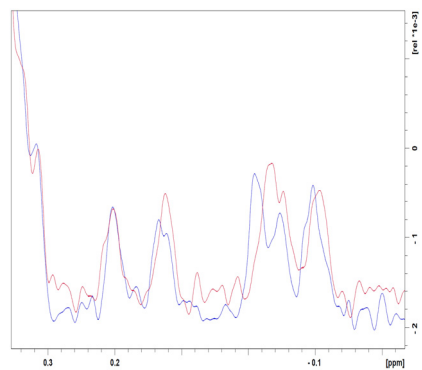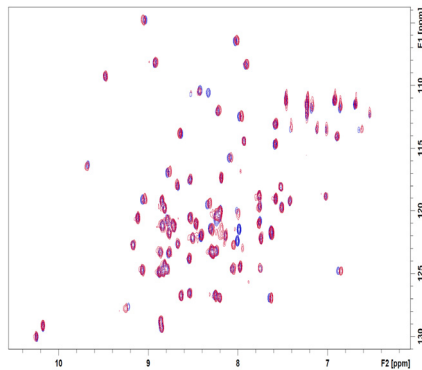



P4B11

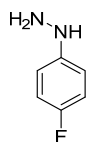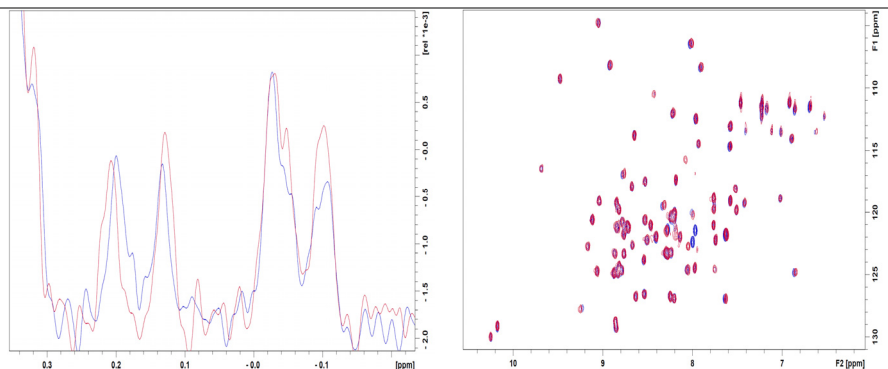

P4G7

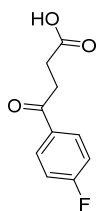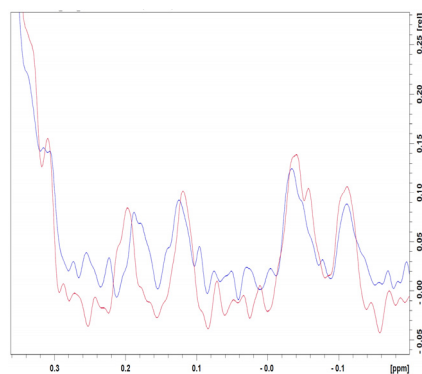

no data

P4G8

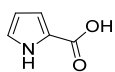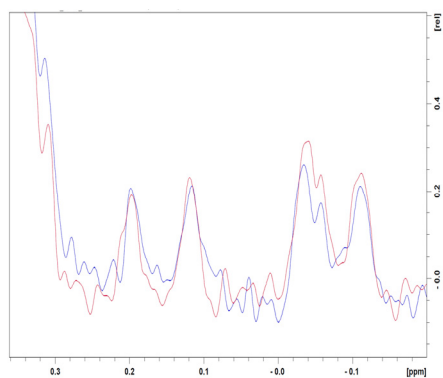

no data

P4G9

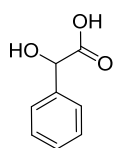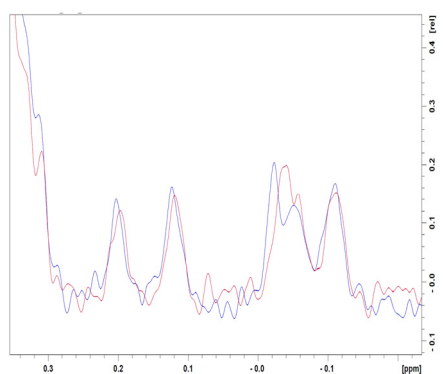

no data

P4G10

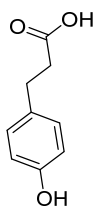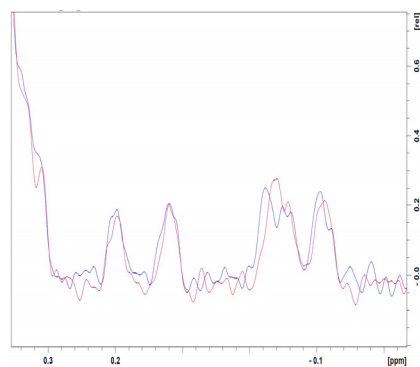

no data

P4G11

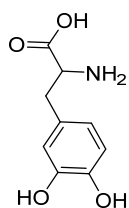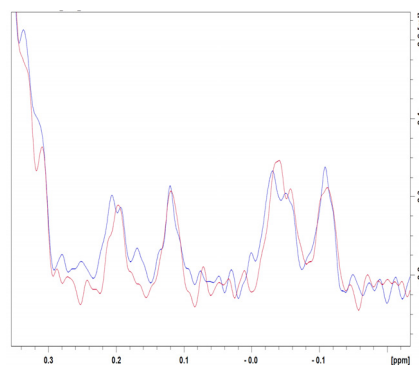

no data

P4G12

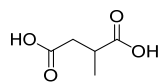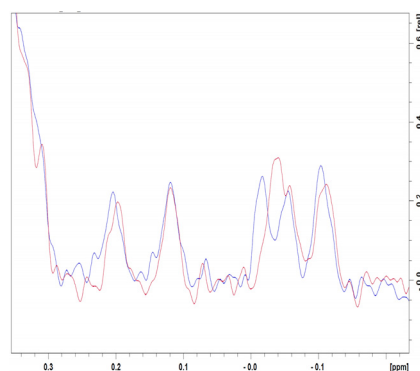

no data

P4H1

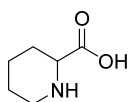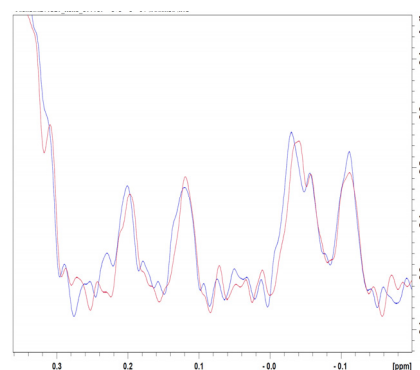

no data

P4H2

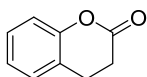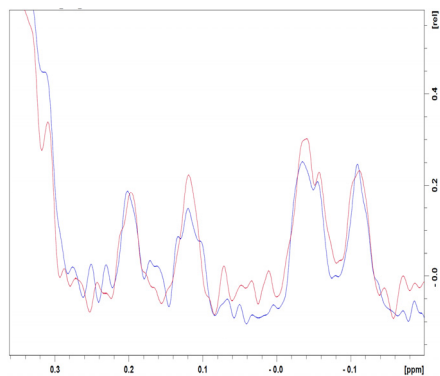

no data

P4H3

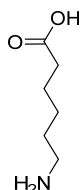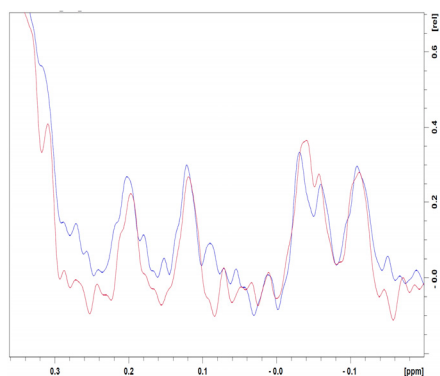

no data

P4H4

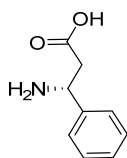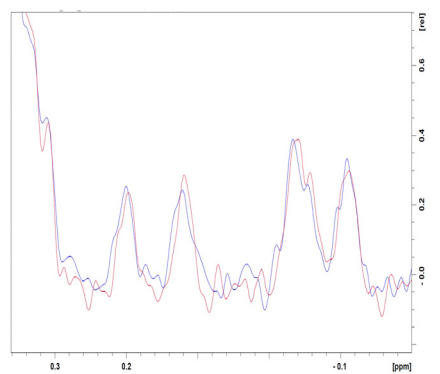

no data

P4H5

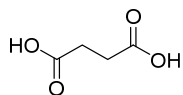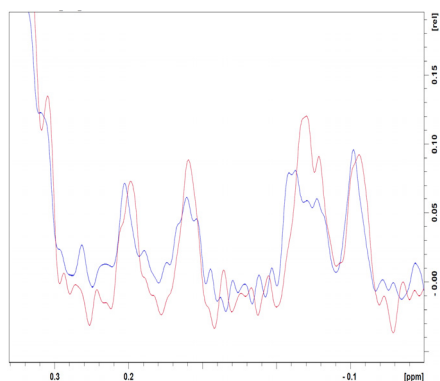

no data

P4H6

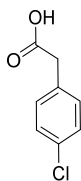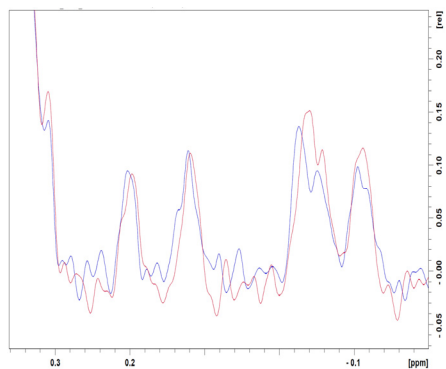

no data

P4H7

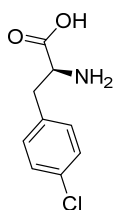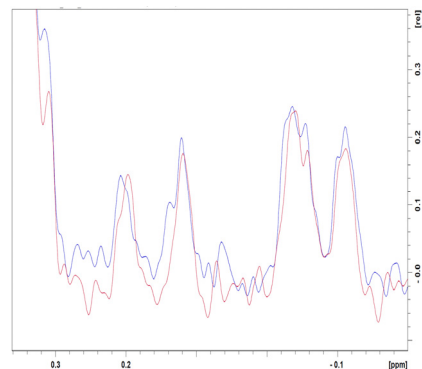

no data

P4H8

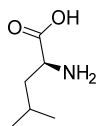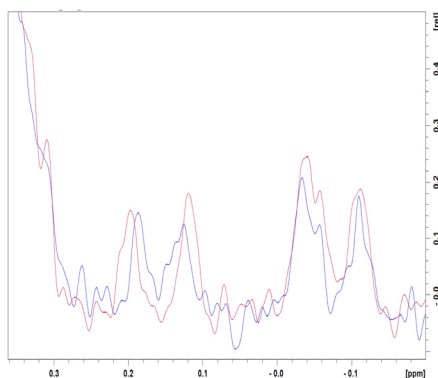

no data

P4H9

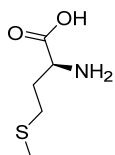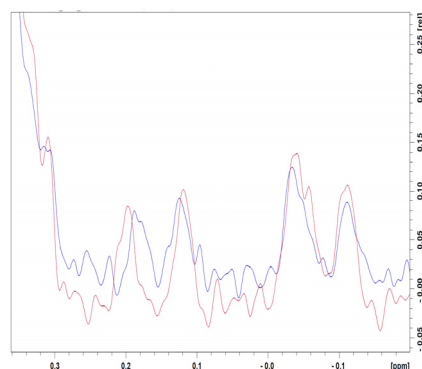

no data

P4H10

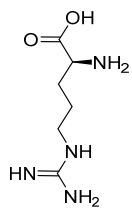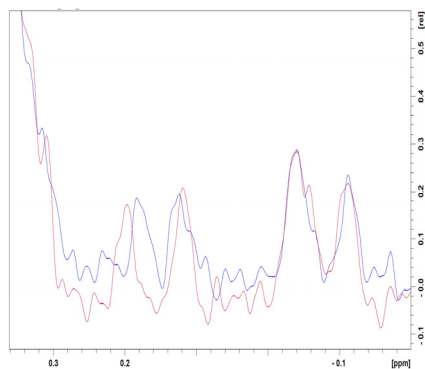

no data

P4H11

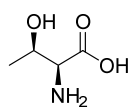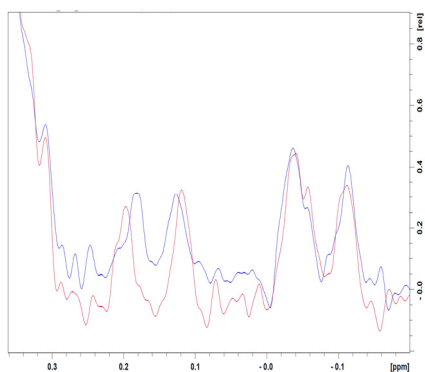

no data

P4H12

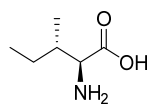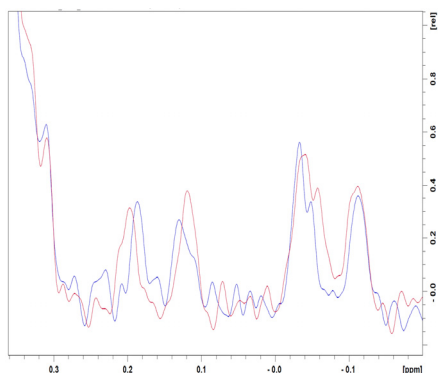

no data
